# Supplementary material
Source: Springer Nature journal article supplement (https://www.springermedizin.de/resource/supplementary/12885_2010_2874_MOESM3_ESM.pdf/9462200)

# Migrating cells

## Control

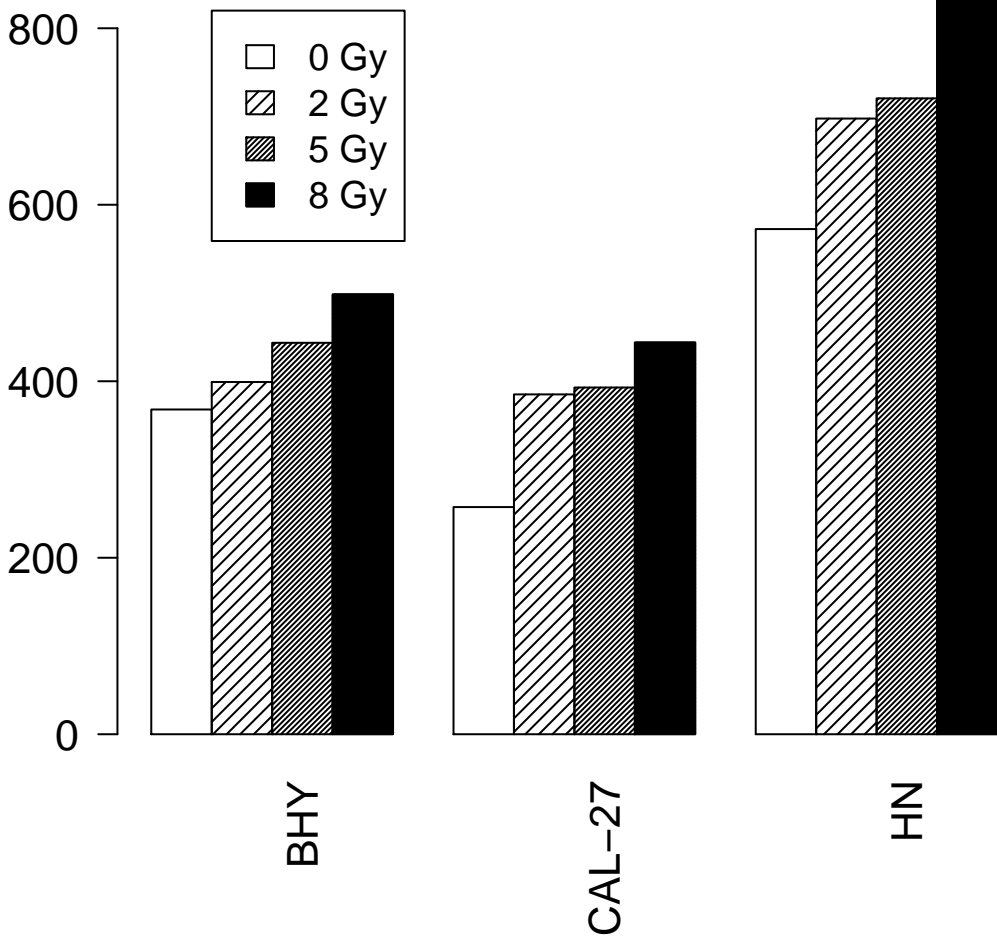

Supplement: MOESM3 [file 9462200]
